1

## 2 **Executive dysfunction following SARS-CoV-2 infection: A cross-sectional** 3 **examination in a population-representative sample**

4 Peter A. Hall PhD<sup>1,2,\*</sup>, Gang Meng PhD<sup>2</sup>, Anna Hudson MSc<sup>1</sup>, Mohammad N. Sakib MBBS<sup>1</sup>, Sara C.  
5 Hitchman PhD<sup>3</sup>, James McKillop PhD<sup>4</sup>, Warren K. Bickel PhD<sup>5</sup>, and Geoffrey T. Fong PhD<sup>1,2,4\*</sup>

6  
7 <sup>1</sup> School of Public Health Sciences, University of Waterloo, Waterloo, Ontario, Canada

8 <sup>2</sup> Department of Psychology, University of Waterloo, Waterloo, Ontario, Canada

9 <sup>3</sup> Department of Communication and Media Research, University of Zurich, Zurich, Switzerland.

10 <sup>4</sup> Department of Psychiatry and Behavioural Neurosciences, McMaster University, Hamilton, Ontario,  
11 Canada

12 <sup>5</sup> Virginia Tech Carilion School of Medicine and Research Institute, Roanoke, Virginia, USA

13 <sup>6</sup> Ontario Institute for Cancer Research, Toronto, Ontario, Canada

14

15 \*Corresponding author information:

16 Peter A. Hall, Ph.D., School of Public Health Sciences, University of Waterloo, 200 University Avenue  
17 West, Waterloo, Ontario, Canada, N2L 3G1.

18 Geoffrey T. Fong, Ph.D., Department of Psychology, University of Waterloo, 200 University Avenue West,  
19 Waterloo, Ontario, Canada, N2L 3G1

20 E-mail: [pahall@uwaterloo.ca](mailto:pahall@uwaterloo.ca)

21 Phone: 519-888-4567 x48110

22

### 23 **Abstract**

24

25 **Background:** Prior studies have documented reliable associations between SARS-CoV-2 infection and  
26 adverse cognitive impact in older adults. The current study sought to determine whether SARS-CoV-2  
27 infection and COVID-19 symptom severity are associated with cognitive dysfunction among young adults  
28 and middle-aged adults in the general population.

29 **Method:** The Canadian COVID-19 Experiences Project (CCEP) survey involves 1,958 adults with equal  
30 representation of vaccinated and vaccine hesitant adults between the ages of 18 and 54 years. The  
31 sample comprised 1,958 adults with a mean age of 37 years ( $SD=10.4$ ); 60.8% were female. The  
32 primary outcome was symptoms of cognitive dysfunction assessed via an abbreviated form of the Barkley  
33 Deficits in Executive Functioning Scale (BDEFS) and performance on a validated decision-making task.

34

35 **Results:** Young and middle-aged adults with a positive SARS-CoV-2 infection history reported a  
36 significantly higher number of symptoms of executive dysfunction ( $M_{adj}=1.89$ ,  $SE=0.08$ ,  $CI: 1.74, 2.04$ ;  
37  $n=175$ ) than their non-infected counterparts ( $M_{adj}=1.63$ ,  $SE=0.08$ ,  $CI: 1.47, 1.80$ ;  $n=1,599$ ;  $\beta=0.26$ ,  
38  $p=.001$ ). Among those infected, there was a dose-response relationship between COVID-19 symptom  
39 severity and level of executive dysfunction, with moderate ( $\beta=0.23$ ,  $CI: 0.003-0.46$ ) and very/extremely  
40 severe ( $\beta= 0.69$ ,  $CI: 0.22-1.16$ ) COVID-19 symptoms being associated with significantly greater  
41 dysfunction, compared to asymptomatic. These effects remained reliable and of similar magnitude after  
42 controlling for age, sex, vaccination status, income, and geographic region, and after removal of those  
43 who had been intubated during hospitalization. Similar effects were found for the decision-making task.

44

45 **Conclusions:** Positive SARS-CoV-2 infection history and COVID-19 symptom severity are associated  
46 with executive dysfunction among young and middle-aged adults with no history of medically induced  
47 coma. These findings are evident on self-reported and task-related indicators of cognitive function.

48

49 **Key words:** SARS-CoV-2; COVID-19; brain; cognition; executive function

## 50 Introduction

51 Cognitive dysfunction is one of the potential adverse consequences of SARS-CoV-2  
52 infection, and this risk may extend well below the age margins for increased mortality  
53 risk. It is understood that SARS-CoV-2 could impact the brain through a number of non-  
54 exclusive, indirect mechanisms including hypoxia, thrombosis, coagulopathy, cytokine  
55 storm, and megakaryocyte invasion.<sup>1-6</sup> Studies of predominantly older, hospitalized  
56 patients have revealed cognitive deficits in the areas of memory, spatial navigation,  
57 attention, short-term memory, and executive function.<sup>5-7</sup> Further, the cognitive  
58 impairments following SARS-Cov-2 infection may persist after the acute phase of  
59 infection,<sup>5</sup> a phenomenon known as “long covid”.<sup>8,9</sup>

60 Several studies have reported reliable evidence of cognitive dysfunction among  
61 those previously infected with SARS-CoV-2.<sup>7,10-13</sup> However, some of these studies are  
62 limited by non-representative samples and lack of comparison to non-infected controls  
63 in the general population. Examination of a population-based sample including  
64 asymptomatic and minimally symptomatic individuals, coupled with a control sample of  
65 non-infected individuals from the same population facilitates quantification of the  
66 reliability and magnitude of SARS-CoV-2 infection impacts on cognition, if they do  
67 indeed exist. Beyond the above, relatively little is known about the extent to which  
68 cognitive deficits are predicted by age or sex, as demographic moderators. The extent  
69 to which SARS-CoV-2 adversely impacts cognitive function among younger and middle-  
70 aged adults is relatively unknown. Of particular interest are the executive functions,  
71 which are especially susceptible to environmental and systemic insult.

72 Executive functions are partially supported by the lateral prefrontal cortex, as well as  
73 the medial orbitofrontal cortex (mOFC). The mOFC is of particular interest, being the  
74 brain subregion most anatomically close to the hypothesized point of SARS-CoV-2  
75 neuroinvasion. Decision-making processes supported by the OFC can be best  
76 assessed using decision-making paradigms with heavy temporal and evaluative  
77 demands, such as a delay discounting task.<sup>14-17</sup> Delay discounting is a neurobehavioral  
78 process reflecting the extent to which future rewards are devalued based on their delay  
79 in time<sup>18</sup> and summarized relative balance between the prefrontal cortices and the  
80 limbic systems.<sup>14</sup> Greater delay discounting is reflected in the tendency to choose a  
81 lower value option that is immediately available over a higher value option that is  
82 delayed in time.

83 Prior studies have shown that damage to the mOFC is associated with increased  
84 delay discounting.<sup>16,17</sup> Impulsive choice of rewards is mediated by dopaminergic activity  
85 within the mOFC,<sup>19</sup> in contrast with choices to avoid punishment, which are mediated by  
86 the lateral OFC.<sup>20</sup> The most anterior aspect of the mOFC has further been proposed as  
87 the subregion most clearly involved in processing of abstract rewards (e.g., money), in  
88 contrast with the posterior mOFC, which is involved in computation of basic rewards  
89 (e.g., food, physical pleasure).<sup>20</sup> Importantly, the anterior mOFC is located immediately  
90 superior to the olfactory bulb and nasal mucous membrane, the primary hypothesized

91 sites for SARS-CoV-2 neuroinvasion, and the presumed source of symptoms of  
92 anosmia and ageusia reported by some infected individuals.<sup>21</sup> This may be a partial  
93 explanation for the diverse neuropsychiatric symptoms<sup>22</sup> displayed by many patients  
94 with severe COVID-19.

95 The current study reports findings from a large national survey of adults in the  
96 general population, who reported cognitive status, SARS-CoV-2 infection history, and  
97 COVID-19 symptom severity. It was hypothesized based on prior research<sup>7,10-13</sup> that  
98 positive SARS-CoV-2 infection history would be associated with greater self-reported  
99 cognitive dysfunction, and that severity of COVID-19 symptoms would be positively  
100 correlated with severity of cognitive dysfunction, in a dose response manner. Finally,  
101 based on the proximity of the mOFC to the hypothesized site of neuroinvasion of SARS-  
102 CoV-2, it was expected that deficits would be evident on a delay discounting task.

103

## 104 1. Methods

### 105 Participants

106 Participants were recruited as part of the Canadian COVID-19 Experiences Project  
107 (CCEP)<sup>23</sup>, a multi-study project which includes a national cohort survey of 1,958 adults  
108 aged 18 to 54. One research objective was to examine differences between fully  
109 vaccinated and vaccine-hesitant individuals on a broad set of demographic,  
110 psychosocial, and experiential variables. Thus, the cohort was recruited to have an  
111 equal proportion of fully vaccinated and vaccine-hesitant Canadians: 50.2% received  
112 two vaccine doses, 43.3% had received no doses, and 6.5% received one vaccine  
113 dose, but were not intending to receive a second. The mean age was 37 ( $SD=10.4$ ) and  
114 60.8% were female.

### 115 Procedure

116 The survey was conducted from 28 September to 21 October 2021, when the  
117 predominant SARS-CoV-2 variant in Canada was Delta (4 weeks prior to the  
118 appearance of Omicron).<sup>24</sup> Participants were contacted by email with an invitation to  
119 participate in the survey. A link to the survey was provided for eligible participants, and  
120 all measures were completed online following provision of informed consent. A quota  
121 target of equal number of vaccinated and vaccine hesitant was applied to obtain a  
122 balanced sample with respect to both vaccinated and vaccine-hesitant populations.  
123 Within each quota target, the sample was recruited from ten Canadian provinces  
124 through an online survey panel (Leger Opinion, the largest nationally representative  
125 probability-based panel in Canada). The survey firm and University of Waterloo  
126 monitored survey response in the sample of each quota to achieve the final  
127 representative sample. This study was reviewed and received ethics clearance from the  
128 institutional research ethics board of the University of Waterloo.

## 129 **Measures**

130 *Executive dysfunction.* Symptoms of executive dysfunction were assessed using four  
131 “self-restraint” subscale items from the Deficits in Executive Functioning Scale, short  
132 form (BDEFS-SF)<sup>25</sup>. Respondents were asked how often they have experienced each  
133 the four problems during the past 6 months, including “I am unable to inhibit my  
134 reactions or responses to events or to other people”, “I make impulsive comments to  
135 others”, “I am likely to do things without considering the consequences for doing them”,  
136 and “I act without thinking”. Responses were indicated on a numerical scale where 1=  
137 never or rarely, 2=sometimes, 3=often, and 4=very often. Cronbach’s alpha for the 4  
138 items was 0.89, indicating acceptable reliability. The four executive dysfunction items  
139 were averaged for this analysis to create a composite executive dysfunction measure.

140 *Delay discounting.* To assess delay discounting, participants completed a validated 5-  
141 trial delay discounting task wherein they were presented with a series of hypothetical  
142 choices between a smaller monetary amount (\$500) immediately or a larger amount  
143 (\$1,000) at various time delays (e.g., 1 month, 3 months).<sup>26</sup> Delay discounting was  
144 calculated as a  $k$  value, reflecting the steepness of a hyperbolic devaluation of delayed  
145 rewards; higher values of  $k$  indicate more impulsive choice.

146 *SARS-CoV-2 infection status:* Infection status was assessed using the question “What  
147 best describes YOUR experience with [SARS-CoV-2] infection?” where 1= I have NOT  
148 been infected, 2 =I have been infected, and 3= not stated.

149 *Symptom severity:* COVID-19 symptom severity was assessed among those who have  
150 been infected by SARS-CoV-2 using two questions. (1) “How do you know that you  
151 HAVE BEEN infected with [SARS-CoV-2]?” responses were given the answers of 1=  
152 had symptoms but did not get tested, 2= had symptoms and tested positive, and 3 =  
153 had no symptoms but tested positive. (2) “How severe was your [SARS-CoV-2] illness?”  
154 The five-point response scale was 1=not at all severe, 2=slightly severe, 3=moderately  
155 severe, 4=very severe, 5=extremely severe. Those reporting “had no symptoms but  
156 tested positive” were incorporated into the second question as 1=not at all severe.

## 157 **Statistical analysis**

158 Samples were post-stratified by geographic/language regions: Alberta, British Columbia,  
159 Manitoba + Saskatchewan, Ontario, Quebec English, and Quebec French, and Atlantic  
160 provinces (Nova Scotia, New Brunswick, Prince Edward Island, Newfoundland and  
161 Labrador). For each of the vaccinated and vaccine hesitant group separately, sampling  
162 weights were computed using a raking procedure and calibrated to target marginal joint  
163 population distributions of the geographic/language regions, and the gender and age  
164 group combinations, based on population figures in the 2016 Canadian census data and  
165 the disposition code in the sample, thus allowing generalization to the Canadian  
166 population. Survey linear regression models incorporating survey strata and weights  
167 were applied to estimate composite executive dysfunction scores and their associations  
168 with SARS-CoV-2 infection status and COVID-19 symptom severity. Regression models

169 controlled for respondents' gender and age groups (18-24, 25-39 and 40-54). All models  
170 were conducted in SAS with SUDAAN V11. All confidence intervals (CI) and statistical  
171 significance were assessed at the 95% confidence level.

172

173

## 174 2. Results

175 Baseline characteristics of the sample are presented in Table 1. The majority of the  
176 participants were female (60%) and from the 25-39 (40%) or 40-54 (43%) age groups.  
177 84% of participants reported that they had not been infected; those who reported having  
178 been infected reported symptoms to be “not at all severe” (3%), “slightly severe” (2.4%),  
179 “moderately severe” (2.7%), with relatively few experiencing “very/extremely severe”  
180 symptoms (1%). The two cognitive measures were positively correlated ( $r=0.17$ ,  
181  $p<.001$ ).

### 182 *Self-reported Executive Dysfunction*

183 Those who reported a prior SARS-CoV-2 infection reported a significantly higher  
184 number of symptoms of executive dysfunction ( $M_{adj}=1.89$ ,  $SE=0.08$ ,  $CI$ : 1.74, 2.04;  
185  $n=175$ ) than their non-infected counterparts ( $M_{adj}=1.63$ ,  $SE=0.08$ ,  $CI$ : 1.47, 1.80;  
186  $n=1,599$ ;  $\beta=0.26$ ,  $p=.001$ ). Men were likely to experience more executive dysfunction  
187 than women ( $\beta= 0.15$ ,  $p<.001$ ); younger adults (25-39 years) were more likely to  
188 experience executive dysfunction than middle aged adults (40-54 years;  $\beta= 0.30$ ,  
189  $p<.001$ ).

190 Among those who were infected, there was a dose-response relationship between  
191 COVID-19 symptom severity and executive dysfunction. Participants who reported  
192 “moderately severe” ( $M_{adj} = 1.85$ , 95%  $CI$  1.63 – 2.08) and “very” or “extremely severe”  
193 ( $M_{adj} = 2.32$ , 95%  $CI$  1.85 – 2.78) COVID-19 symptoms were significantly more likely to  
194 have higher levels of executive dysfunction compared to non-infected individuals ( $M_{adj} =$   
195  $1.62$ , 95%  $CI$  1.58 – 1.66) (Table 2). A dose-response relationship between COVID-19  
196 symptom severity and cognitive dysfunction was evident, those with moderate ( $\beta=0.23$ ,  
197  $CI$ : 0.003-0.46) and very/extremely severe ( $\beta= 0.69$ ,  $CI$ : 0.22-1.16) COVID-19  
198 symptoms being associated with significantly greater degrees of executive dysfunction,  
199 compared to those not infected and those with asymptomatic infections (Figure 2).  
200 Removing the those who reported having been intubated ( $n=5$ ) or hospitalized without  
201 intubation ( $n=5$ ) did not change the findings. Likewise, following further adjustment for  
202 vaccination status, income, and geographical region, those in the very/extremely severe  
203 symptom categories continued to report significantly greater symptoms of executive  
204 dysfunction than the non-infected reference group ( $\beta=0.71$ , 95%  $CI$  0.22 - 1.19,  $p=.004$ ).

### 205 *Delay Discounting Task Performance*

206 Participants infected with SARS-CoV-2 displayed significantly higher delay  
207 discounting rates ( $k = 1.22$ ,  $SE=0.48$ ,  $CI$ : 0.27, 2.16) than non-infected participants  
208 ( $k=0.37$ ,  $SE=0.08$ ,  $CI$ : 0.21, 0.52;  $\beta=.31$ ,  $p=.017$ ; Table 3). With respect to dose-

209 response effects of symptom severity, among infected individuals, those reporting “very  
210 severe” COVID-19 symptoms demonstrated significantly higher delay discounting rates  
211 than those reporting no infection history, with the remaining severity categories falling  
212 between these two values. Discount curves for infected versus non-infected, and  
213 among severity levels ranging from asymptomatic and very severe are presented in  
214 Figure 1 panel b.

215 In general, males had marginally steeper discount rates than females ( $\beta=-.10$ ,  
216  $p=.066$ ), and individuals reporting high incomes had significantly lower discounting rates  
217 than individuals reporting low income ( $\beta=-.30$ ,  $p<.001$ ). No significant age differences in  
218  $k$  values were observed (see supplementary materials). No two-way interactions were  
219 observed between sex and infection status predicting delay discounting were observed  
220 (Wald  $F=0.09$ ,  $p=0.91$ ), or between age and infection status predicting delay discounting  
221 (Wald  $F=0.90$ ,  $p=0.46$ ). Likewise, the three-way interaction term between sex, age and  
222 infection status in predicting delay discounting was non-significant (Wald  $F=1.37$ ,  
223  $p=0.22$ ).

### 224 *Sensitivity Analyses*

225 Further adjustment for education and geographical region (i.e., province) had no  
226 overall effect on the findings. In education and province-adjusted models, those  
227 reporting a SARS-CoV-2 infection continued to show a significantly greater degree of  
228 delay discounting than those non-infected ( $\beta=-0.32$ ,  $CI: -0.57, -0.06$ ,  $p=.014$ ). Also similar  
229 to earlier analyses, those in the “very severe” COVID-19 symptom severity category  
230 showed greater discounting than those in the non-infected group ( $\beta=1.28$ ,  $CI: 0.35, 2.21$ ,  
231  $p=.007$ ). Likewise, removal of 5 cases reporting being placed on mechanical ventilator  
232 did not change the effects of SARS-CoV-2 infection status ( $\beta=.23$ ,  $CI: 0.01, 0.45$ ,  
233  $p=.043$ ) or COVID-19 symptom severity ( $\beta=.95$ ,  $CI: 0.20, 1.71$ ,  $p=.014$ ) on delay  
234 discounting rate. Finally, when limiting the “infected” group to only those whom reported  
235 having their infection confirmed by a positive PCR test, the effect of SARS-CoV-2  
236 infection remained significant, and somewhat stronger in magnitude ( $\beta=.40$ ;  $CI: 0.07$ ,  
237  $0.72$ ,  $p=.016$ ).

238

### 239 **3. Discussion**

240 In this population-representative cohort of community-dwelling adults, those with a  
241 positive history of SARS-CoV-2 infection reported more symptoms of cognitive  
242 dysfunction than those with no such history. This effect was evident on both self-  
243 reported symptoms of executive dysfunction and on a validated decision-making task. A  
244 dose-response relationship between COVID-19 symptom severity and magnitude of  
245 cognitive dysfunction was evident such that increasing infection severity was associated  
246 with greater symptoms of cognitive dysfunction for both self-reported symptoms and  
247 task performance. Importantly, reliable effects of positive SARS-CoV-2 infection history  
248 and COVID-19 symptom severity on cognitive dysfunction were evident—on both

249 measures—even in this sample of individuals not typically subject to age-related  
250 cognitive decline (ages 18 to 54) and not exposed to medically induced coma via  
251 hospital-based treatment for severe COVID-19. Our findings were similar to a prior  
252 report of executive dysfunction as correlated with COVID-19 symptom severity in a  
253 large population sample<sup>13</sup>, but extend them to include self-reported symptoms of  
254 interpersonal significance, and a standardized decision making paradigm previously  
255 linked to the site of hypothesized neuroinvasion of the SARS-CoV-2 virus (the mOFC;  
256 Figure 1 panel A).

257 There are several hypothesized mechanisms by which SARS-CoV-2 infection may  
258 produce cognitive dysfunction, including encephalitis, coagulopathy, cytokine storm,  
259 hypoxia, and megakaryocyte invasion.<sup>4–6</sup> The current investigation cannot distinguish  
260 among these neurophysiological mechanisms, or others that may yet be identified. The  
261 current findings do not preclude the possibility that symptoms of cognitive dysfunction  
262 are influenced by reporting biases among those who are continuing to experience  
263 emotional distress following the measurement period. Given that the effects of negative  
264 mood on symptom reporting is causally established,<sup>27,28</sup> and given that mood impacts of  
265 the COVID-19 pandemic are well-documented,<sup>29–33</sup> this possibility cannot be definitively  
266 excluded. However, at least one prior population-based study has found similar dose-  
267 response effects using performance-based measures of cognitive function (i.e.,  
268 cognitive tasks rather than reported symptoms).<sup>7</sup> It is further noteworthy that the same  
269 patterns were evident on our decision-making task.

270 It is not clear why there appeared to be a stronger link between SARS-CoV-2  
271 infection and cognitive dysfunction in younger adults as compared with middle-aged  
272 adults. It is possible that such deficits were more salient to younger adults, given that a  
273 higher proportion would be in educational programs wherein lapses in attention and  
274 concentration may have been more impactful. In either case, it is not clear how  
275 consequential symptoms of cognitive dysfunction would be expected to be, even if  
276 reliable across studies. It is not uncommon for other types of viral infections to cause  
277 symptoms of cognitive dysfunction, including the seasonal flu, herpes, MERS, Zika and  
278 Varicella (chickenpox).<sup>34–38</sup> Documenting the stability and functional impact of any  
279 SARS-CoV-2 infection impairments in cognition will be important. However, in the  
280 meantime, reductions in unnecessary exposure to SARS-CoV-2 infection may be an  
281 important public health strategy even for young and middle aged adults, despite the  
282 limited mortality risk.

283 Finally, given that the predominant SARS-CoV-2 variant during the time of the  
284 survey was Delta, the findings are applicable only to the Delta and earlier variants.  
285 Moreover, the retrospective nature of the study does not allow us to determine with  
286 confidence which infections were attributable to Delta versus earlier variants. We also  
287 cannot conclude that the same associations would be observed with the Omicron  
288 variant, in particular because of the lower COVID-19 symptom severity apparent with  
289 Omicron in comparison with earlier variants, at least based on early data.<sup>39–41</sup> In the

290 current (pre-Omicron) sample, we found that only moderate and higher COVID-19  
291 symptom severities were associated with significantly elevated symptoms of executive  
292 dysfunction. Further analyses of follow-up waves of the CCEP data will enable  
293 examination of the relative impact of the Omicron variant on symptoms of executive  
294 dysfunction.

### 295 *Strengths and Limitations*

296 There are several strengths of the current study. One strength is the use of a large  
297 population-representative sample, consisting of infected individuals of a wide range of  
298 disease symptom severities—ranging from asymptomatic to hospitalized—as well as  
299 non-infected controls. Another strength is the use of a validated measure of subjective  
300 symptomology assessing everyday function rather than more sensitive but less  
301 ecologically valid performance-based measures. Finally, the finding of similar effects on  
302 a decision-making task performance increases confidence that the findings were not a  
303 function of self-report methodology alone. In terms of limitations, by virtue of the survey  
304 format, it was not possible to validate the infection status of individuals by testing. This  
305 may lead to under- or over-estimation of effect size and statistical significance of tests,  
306 vis-a-vis misreporting of infection status. This is a limitation of many survey studies of  
307 COVID-19 and cognitive dysfunction, however. Finally, the cross-sectional design limits  
308 our ability to draw causal inferences.

309 Future studies should examine the longevity of cognitive dysfunction symptoms over  
310 time, as well as the extent to which the dose-response and age gradients observed here  
311 are replicable across samples. Finally, additional studies examining neurological  
312 impacts at the level of the brain itself will be required, using functional brain imaging  
313 paradigms to quantify structural and functional impacts of SARS-CoV-2 infection. In  
314 particular studies are needed that follow individuals forward from the point of infection to  
315 examine changes over time, in a prospective manner.

### 316 *Conclusions*

317 In summary, the current study used a population-representative sample consisting of  
318 a balanced proportion of vaccinated and unvaccinated individuals to estimate the  
319 association between SARS-CoV-2 infection and symptoms of cognitive dysfunction.  
320 Findings indicated that individuals previously infected with SARS-CoV-2 reported  
321 significantly greater symptoms of cognitive dysfunction than non-infected individuals.  
322 Further, among those reporting a positive infection history, a dose-response relationship  
323 between COVID-19 symptom severity and cognitive dysfunction was evident, such that  
324 those with moderate to severe symptoms were more likely to experience symptoms of  
325 cognitive dysfunction. The above pattern was evident for both self-reported symptoms  
326 of cognitive dysfunction and performance on a decision-making task. Taken together  
327 with findings from other studies, cognitive dysfunction appears to be a correlated of  
328 SARS-CoV-2 infection, particularly among those with at least moderate COVID-19  
329 symptom severity. If such cognitive effects are long-lasting, this may be one piece of



330 evidence in support of public health strategies that eliminate exposure to SARS-CoV-2  
331 infection, even for young adults and those below the typical high-risk age threshold for  
332 mortality.

333

### 334 **Research ethics statement**

335 This study protocol was reviewed by and received approval from the University of  
336 Waterloo Office of Research Ethics.

337

### 338 **Funding statement**

339 Funding for this study was provided by a grant from the Canadian Institutes of Health  
340 Research (GA3-177733) to P. Hall (PI), G. Fong (co-PI) and S. Hitchman (co-I).

341

### 342 **Data Availability Statement**

343 Data will be available upon reasonable request to either of the corresponding authors.

344

### 345 **Conflicts of Interests**

346 The authors declare no conflicts of interest.

347

### 348 **Acknowledgements**

349 We thank Anne C.K. Quah and Thomas Agar for their assistance with survey design  
350 and management.

351

### 352 **Figure 1 Legend**

353 Conceptual diagram (A) and delay discounting curves for non-infected and ranges of  
354 COVID-19 symptom severity from asymptomatic to “very severe” (B).

355

### 356 **Figure 2 Legend**

357 Effects of SARS-CoV-2 infection status and COVID-19 symptom severity on BDEFS  
358 scores; BDEFS=Barkley Deficits in Executive Functioning Scale.

359

360 Table 1: Sample characteristics.

| <b>Variables</b>                | <b><i>n</i></b> | <b>%</b> | <b>Executive function (unadjusted) Mean, 95% CI</b> | <b>Executive function (adjusted) Mean, 95% CI</b> |
|---------------------------------|-----------------|----------|-----------------------------------------------------|---------------------------------------------------|
| Gender                          |                 |          |                                                     |                                                   |
| Male                            | 747             | 39.27    | -                                                   | -                                                 |
| Female                          | 1155            | 60.73    | -                                                   | -                                                 |
| Age Group                       |                 |          |                                                     |                                                   |
| 18-24                           | 313             | 16.46    | -                                                   | -                                                 |
| 25-39                           | 769             | 40.43    | -                                                   | -                                                 |
| 40-54                           | 820             | 43.11    | -                                                   | -                                                 |
| Infection Status                |                 |          |                                                     |                                                   |
| Not infected                    | 1599            | 84.07    | 1.62 (1.58, 1.66)                                   | 1.62 (1.58, 1.66)                                 |
| Infected: Not at all severe     | 57              | 3.00     | 1.72 (1.52, 1.93)                                   | 1.73 (1.54, 1.91)                                 |
| Infected: Slightly severe       | 46              | 2.42     | 1.78 (1.44, 2.11)                                   | 1.75 (1.45, 2.05)                                 |
| Infected: Moderately severe     | 51              | 2.68     | 1.83 (1.60, 2.06)                                   | 1.85 (1.63, 2.08)                                 |
| Infected: Very/extremely severe | 21              | 1.10     | 2.29 (1.82, 2.76)                                   | 2.32 (1.85, 2.78)                                 |
| Not stated                      | 128             | 6.73     | 1.64 (1.46, 1.81)                                   | 1.63 (1.47, 1.80)                                 |

361 Note: Executive dysfunction mean is the average of the four BDEFS items. Participants  
 362 who had no COVID-19 symptoms, but tested positive for SARS-CoV-2, were classified  
 363 as “not at all severe”. The adjusted parameters are adjusted by sex and group. Table 1  
 364 includes the sample used in the current analysis ( $N = 1,902$ ).

365

366

367 Table 2: Associations between SARS-CoV-2 infection status, COVID-19 symptom  
368 severity and BDEFS scores.

---

| <b>Variables</b>                | <b>Beta (95% CI)</b> | <b>p</b> |
|---------------------------------|----------------------|----------|
| Gender                          |                      |          |
| Male                            | 0.15 (0.07, 0.22)    | <0.001   |
| Female                          | Ref                  | Ref      |
| Age Group                       |                      |          |
| 18-24                           | 0.30 (0.19, 0.41)    | <0.001   |
| 25-39                           | 0.06 (-0.02, 0.14)   | 0.138    |
| 40-54                           | Ref                  | Ref      |
| COVID-19 Infection Status       |                      |          |
| Not infected                    | Ref                  | Ref      |
| Infected: Not at all severe     | 0.10 (-0.09, 0.29)   | 0.284    |
| Infected: Slightly severe       | 0.13 (-0.17, 0.42)   | 0.406    |
| Infected: Moderately severe     | 0.23 (0.00, 0.46)    | 0.047    |
| Infected: Very/Extremely severe | 0.69 (0.22, 1.16)    | 0.004    |
| Not stated                      | 0.01 (-0.16, 0.18)   | 0.903    |

---

369

370

371 Table 3: Associations between SARS-CoV-2 infection status, COVID-19 symptom  
372 severity and delay discounting.

| <b>Variables</b>            | <b>Beta</b>          | <b>p</b> |
|-----------------------------|----------------------|----------|
| <i>Infection Status</i>     |                      |          |
| COVID-19 infection status   |                      |          |
| Infected                    | 0.31 (0.06, 0.56)    | 0.017    |
| Not infected                | Ref                  | Ref      |
| Not stated                  | -0.01 (-0.22, 0.20)  | 0.91     |
| <i>Symptom Severity</i>     |                      |          |
| Gender                      |                      |          |
| Male                        | -0.10 (-0.20, 0.01)  | 0.066    |
| Female                      | Ref                  | Ref      |
| Age group                   |                      |          |
| 18-24                       | -0.04 (-0.18, 0.11)  | 0.618    |
| 25-39                       | 0.01 (-0.11, 0.13)   | 0.893    |
| 40-54                       | Ref                  | Ref      |
| Income                      |                      |          |
| Low                         | Ref                  | Ref      |
| Moderate                    | 0.02 (-0.17, 0.21)   | 0.838    |
| High                        | -0.30 (-0.45, -0.16) | <0.001   |
| No answer                   | -0.34 (-0.57, -0.12) | 0.002    |
| COVID-19 infection status   |                      |          |
| Not infected                | Ref                  | Ref      |
| Infected: Asymptomatic      | -0.01 (-0.29, 0.27)  | 0.934    |
| Infected: Slightly severe   | 0.24 (-0.09, 0.57)   | 0.147    |
| Infected: Moderately severe | 0.34 (-0.11, 0.79)   | 0.141    |
| Infected: Very severe       | 1.26 (0.31, 2.21)    | 0.009    |
| Not stated                  | -0.01                | 0.92     |

373

374

375 **Author Contributions**

376

377 PH, GF, and SH conceived the study, planned and oversaw the statistical analyses, and  
378 wrote the final draft. GM planned and completed all statistical analyses and contributed  
379 to the writing of the final draft. MNS, AH, JM, and WB contributed to the writing of the  
380 final draft.

381

382 References

383

- 384 1. Boldrini M, Canoll PD, Klein RS. How COVID-19 Affects the Brain. *JAMA*  
385 *Psychiatry*. 2021;78(6):682. doi:10.1001/jamapsychiatry.2021.0500
- 386 2. Mao L, Jin H, Wang M, et al. Neurologic Manifestations of Hospitalized Patients  
387 With Coronavirus Disease 2019 in Wuhan, China. *JAMA Neurol*. 2020;77(6):683-  
388 690. doi:10.1001/jamaneurol.2020.1127
- 389 3. McFadyen JD, Stevens H, Peter K. The Emerging Threat of (Micro)Thrombosis in  
390 COVID-19 and Its Therapeutic Implications. *Circ Res*. 2020;127(4):571-587.  
391 doi:10.1161/CIRCRESAHA.120.317447
- 392 4. Nauen DW, Hooper JE, Stewart CM, Solomon IH. Assessing Brain Capillaries in  
393 Coronavirus Disease 2019. *JAMA Neurol*. 2021;78(6):760-762.  
394 doi:10.1001/jamaneurol.2021.0225
- 395 5. Ritchie K, Chan D. The emergence of cognitive COVID. *World Psychiatry*.  
396 2021;20(1):52-53. doi:10.1002/wps.20837
- 397 6. Solomon T. Neurological infection with SARS-CoV-2 — the story so far. *Nat Rev*  
398 *Neurol*. 2021;17(2):65-66. doi:10.1038/s41582-020-00453-w
- 399 7. Jaywant A, Vanderlind WM, Alexopoulos GS, Fridman CB, Perlis RH, Gunning FM.  
400 Frequency and profile of objective cognitive deficits in hospitalized patients  
401 recovering from COVID-19. *Neuropsychopharmacology*. 2021;46(13):2235-2240.  
402 doi:10.1038/s41386-021-00978-8
- 403 8. Ladds E, Rushforth A, Wieringa S, et al. Persistent symptoms after Covid-19:  
404 qualitative study of 114 “long Covid” patients and draft quality principles for  
405 services. *BMC Health Serv Res*. 2020;20(1):1144. doi:10.1186/s12913-020-06001-  
406 y
- 407 9. Rubin R. As Their Numbers Grow, COVID-19 “Long Haulers” Stump Experts.  
408 *JAMA*. 2020;324(14):1381-1383. doi:10.1001/jama.2020.17709
- 409 10. Becker JH, Lin JJ, Doernberg M, et al. Assessment of Cognitive Function in  
410 Patients After COVID-19 Infection. *JAMA Netw Open*. 2021;4(10):e2130645.  
411 doi:10.1001/jamanetworkopen.2021.30645
- 412 11. Liu YH, Wang YR, Wang QH, et al. Post-infection cognitive impairments in a cohort  
413 of elderly patients with COVID-19. *Mol Neurodegener*. 2021;16(1):48.  
414 doi:10.1186/s13024-021-00469-w
- 415 12. Almeria M, Cejudo JC, Sotoca J, Deus J, Krupinski J. Cognitive profile following  
416 COVID-19 infection: Clinical predictors leading to neuropsychological impairment.  
417 *Brain Behav Immun - Health*. 2020;9:100163. doi:10.1016/j.bbih.2020.100163

- 418 13. Hampshire A, Trender W, Chamberlain SR, et al. *Cognitive Deficits in People Who*  
419 *Have Recovered from COVID-19 Relative to Controls: An N=84,285 Online Study.*;  
420 2020:2020.10.20.20215863. doi:10.1101/2020.10.20.20215863
- 421 14. McClure SM, Laibson DI, Loewenstein G, Cohen JD. Separate Neural Systems  
422 Value Immediate and Delayed Monetary Rewards. *Science*. 2004;306(5695):503-  
423 507. doi:10.1126/science.1100907
- 424 15. Massar SAA, Libedinsky C, Weiyan C, Huettel SA, Chee MWL. Separate and  
425 overlapping brain areas encode subjective value during delay and effort  
426 discounting. *NeuroImage*. 2015;120:104-113.  
427 doi:10.1016/j.neuroimage.2015.06.080
- 428 16. Peters J, D'Esposito M. Effects of Medial Orbitofrontal Cortex Lesions on Self-  
429 Control in Intertemporal Choice. *Curr Biol*. 2016;26(19):2625-2628.  
430 doi:10.1016/j.cub.2016.07.035
- 431 17. Sellitto M, Ciaramelli E, di Pellegrino G. Myopic Discounting of Future Rewards  
432 after Medial Orbitofrontal Damage in Humans. *J Neurosci*. 2010;30(49):16429-  
433 16436. doi:10.1523/JNEUROSCI.2516-10.2010
- 434 18. Bickel WK, Marsch LA. Toward a behavioral economic understanding of drug  
435 dependence: delay discounting processes. *Addiction*. 2001;96(1):73-86.  
436 doi:10.1046/j.1360-0443.2001.961736.x
- 437 19. Winstanley CA, Theobald DEH, Dalley JW, Cardinal RN, Robbins TW. Double  
438 Dissociation between Serotonergic and Dopaminergic Modulation of Medial  
439 Prefrontal and Orbitofrontal Cortex during a Test of Impulsive Choice. *Cereb*  
440 *Cortex*. 2006;16(1):106-114. doi:10.1093/cercor/bhi088
- 441 20. Kringelbach ML, Rolls ET. The functional neuroanatomy of the human orbitofrontal  
442 cortex: evidence from neuroimaging and neuropsychology. *Prog Neurobiol*.  
443 2004;72(5):341-372. doi:10.1016/j.pneurobio.2004.03.006
- 444 21. Vaira LA, Salzano G, Deiana G, De Riu G. Anosmia and Ageusia: Common  
445 Findings in COVID-19 Patients. *The Laryngoscope*. 2020;130(7):1787-1787.  
446 doi:10.1002/lary.28692
- 447 22. Taquet M, Geddes JR, Husain M, Luciano S, Harrison PJ. 6-month neurological  
448 and psychiatric outcomes in 236-379 survivors of COVID-19: a retrospective  
449 cohort study using electronic health records. *Lancet Psychiatry*. 2021;8(5):416-427.  
450 doi:10.1016/S2215-0366(21)00084-5
- 451 23. Hall P, Fong G, Hitchman S. The Canadian COVID-19 Experiences Survey: Study  
452 Protocol. medRxiv. Published online 2021.
- 453 24. Canada PHA of. COVID-19 daily epidemiology update. aem. Published April 19,  
454 2020. Accessed January 2, 2022. <https://health-infobase.canada.ca/covid->

- 455 19/epidemiological-summary-covid-19-  
456 cases.html?stat=rate&measure=total\_last14&map=pt
- 457 25. Barkley RA. *Barkley Deficits in Executive Functioning Scale (BDEFS)*. Guilford  
458 Press; 2011.
- 459 26. Koffarnus MN, Bickel WK. A 5-trial adjusting delay discounting task: Accurate  
460 discount rates in less than one minute. *Exp Clin Psychopharmacol*.  
461 2014;22(3):222-228. doi:10.1037/a0035973
- 462 27. Howren MB, Suls J. The symptom perception hypothesis revised: Depression and  
463 anxiety play different roles in concurrent and retrospective physical symptom  
464 reporting. *J Pers Soc Psychol*. 2011;101(1):182. doi:10.1037/a0021715
- 465 28. Reimers S, Maylor EA, Stewart N, Chater N. Associations between a one-shot  
466 delay discounting measure and age, income, education and real-world impulsive  
467 behavior. *Personal Individ Differ*. 2009;47(8):973-978.  
468 doi:10.1016/j.paid.2009.07.026
- 469 29. Czeisler MÉ, Lane RI, Petrosky E, et al. Mental Health, Substance Use, and  
470 Suicidal Ideation During the COVID-19 Pandemic — United States, June 24–30,  
471 2020. *Morb Mortal Wkly Rep*. 2020;69(32):1049-1057.  
472 doi:10.15585/mmwr.mm6932a1
- 473 30. Xiong J, Lipsitz O, Nasri F, et al. Impact of COVID-19 pandemic on mental health  
474 in the general population: A systematic review. *J Affect Disord*. 2020;277:55-64.  
475 doi:10.1016/j.jad.2020.08.001
- 476 31. Duan L, Shao X, Wang Y, et al. An investigation of mental health status of children  
477 and adolescents in china during the outbreak of COVID-19. *J Affect Disord*.  
478 2020;275:112-118. doi:10.1016/j.jad.2020.06.029
- 479 32. Daly M, Sutin AR, Robinson E. Longitudinal changes in mental health and the  
480 COVID-19 pandemic: evidence from the UK Household Longitudinal Study.  
481 *Psychol Med*. Published online November 13, 2020:1-10.  
482 doi:10.1017/S0033291720004432
- 483 33. Hall PA, Sheeran P, Fong GT, et al. Biobehavioral Aspects of the COVID-19  
484 Pandemic: A Review. *Psychosom Med*. 2021;83(4):309-321.  
485 doi:10.1097/PSY.0000000000000932
- 486 34. Goenka A, Michael BD, Ledger E, et al. Neurological Manifestations of Influenza  
487 Infection in Children and Adults: Results of a National British Surveillance Study.  
488 *Clin Infect Dis*. 2014;58(6):775-784. doi:10.1093/cid/cit922
- 489 35. Kim JE, Heo JH, Kim H ok, et al. Neurological Complications during Treatment of  
490 Middle East Respiratory Syndrome. *J Clin Neurol*. 2017;13(3):227.  
491 doi:10.3988/jcn.2017.13.3.227



- 492 36. de Araújo TVB, Rodrigues LC, de Alencar Ximenes RA, et al. Association between  
493 Zika virus infection and microcephaly in Brazil, January to May, 2016: preliminary  
494 report of a case-control study. *Lancet Infect Dis*. 2016;16(12):1356-1363.  
495 doi:10.1016/S1473-3099(16)30318-8
- 496 37. Berger JR, Houff S. Neurological Complications of Herpes Simplex Virus Type 2  
497 Infection. *Arch Neurol*. 2008;65(5). doi:10.1001/archneur.65.5.596
- 498 38. Gildea DH, Kleinschmidt-DeMasters BK, LaGuardia JJ, Mahalingam R, Cohrs RJ.  
499 Neurologic Complications of the Reactivation of Varicella–Zoster Virus. *N Engl J*  
500 *Med*. 2000;342(9):635-645. doi:10.1056/NEJM200003023420906
- 501 39. Christie B. Covid-19: Early studies give hope omicron is milder than other variants.  
502 *BMJ*. 2021;375:n3144. doi:10.1136/bmj.n3144
- 503 40. Abdullah F, Myers J, Basu D, et al. Decreased severity of disease during the first  
504 global omicron variant covid-19 outbreak in a large hospital in tshwane, south  
505 africa. *Int J Infect Dis*. Published online December 2021:S120197122101256X.  
506 doi:10.1016/j.ijid.2021.12.357
- 507 41. Sheikh A, Kerr S, Woolhouse M, McMenemy J, Robertson C. Severity of Omicron  
508 variant of concern and vaccine effectiveness against symptomatic disease: national  
509 cohort with nested test negative design study in Scotland. Published online  
510 December 22, 2021. Accessed January 2, 2022.  
511 [https://www.research.ed.ac.uk/en/publications/severity-of-omicron-variant-of-](https://www.research.ed.ac.uk/en/publications/severity-of-omicron-variant-of-concern-and-vaccine-effectiveness-)  
512 [concern-and-vaccine-effectiveness-](https://www.research.ed.ac.uk/en/publications/severity-of-omicron-variant-of-concern-and-vaccine-effectiveness-)
- 513

A

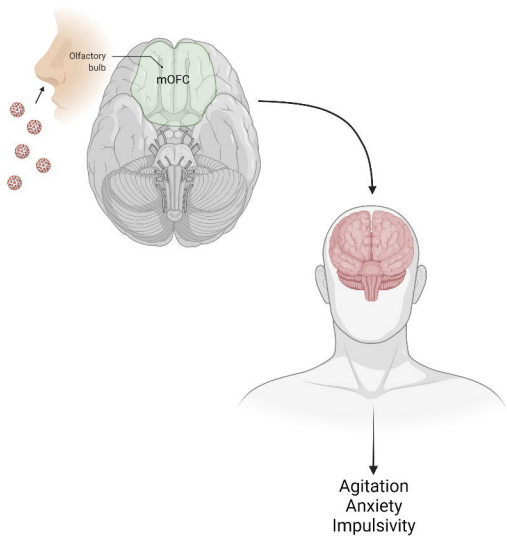

B

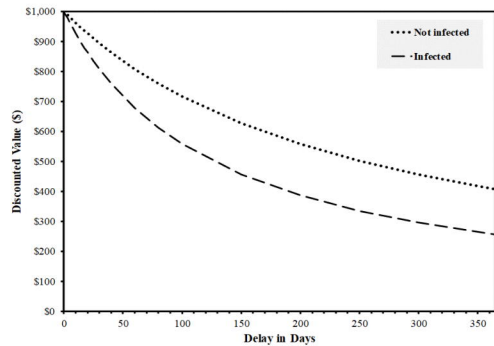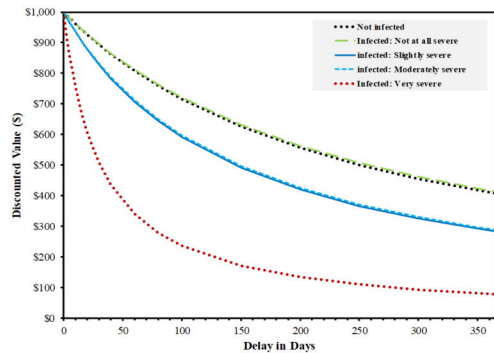

# COVID-19 symptom severity and BDEFS total score

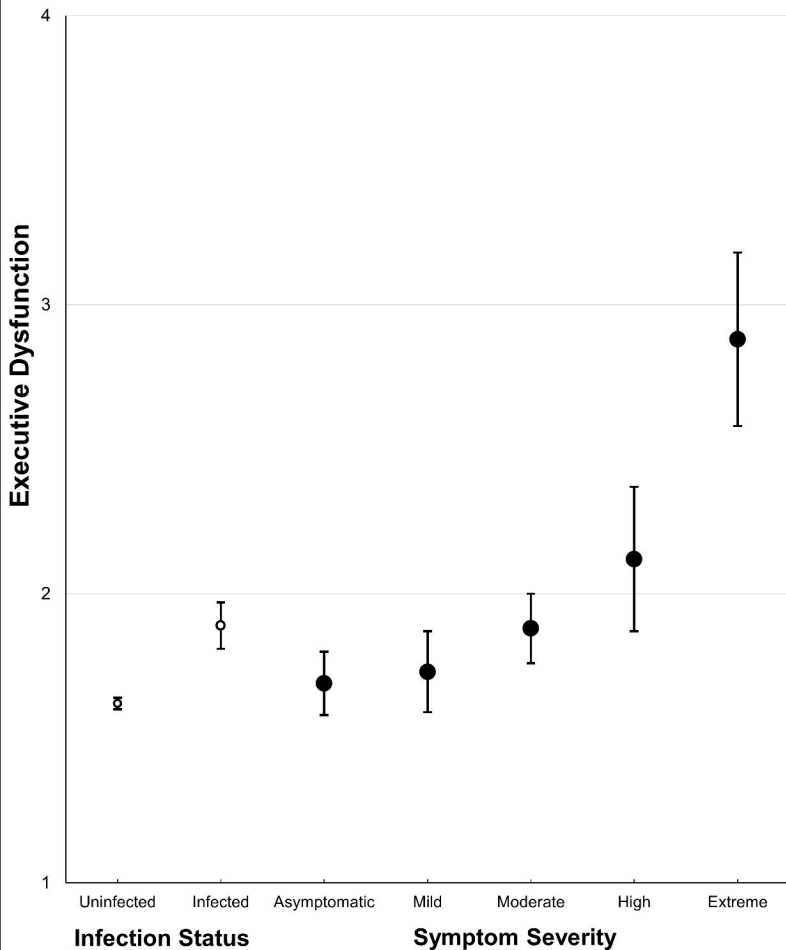

Source: https://www.medrxiv.org/content/10.1101/2022.01.01.22268614v4.full.pdf
